# Supplementary material for: Elucidating Syntrophic Butyrate-Degrading Populations in Anaerobic Digesters Using Stable-Isotope-Informed Genome-Resolved Metagenomics
Source: PubMed Central journal article supplement (PMC6687939; doi:10.1128/msystems.00159-19), 2019-08-06

**A**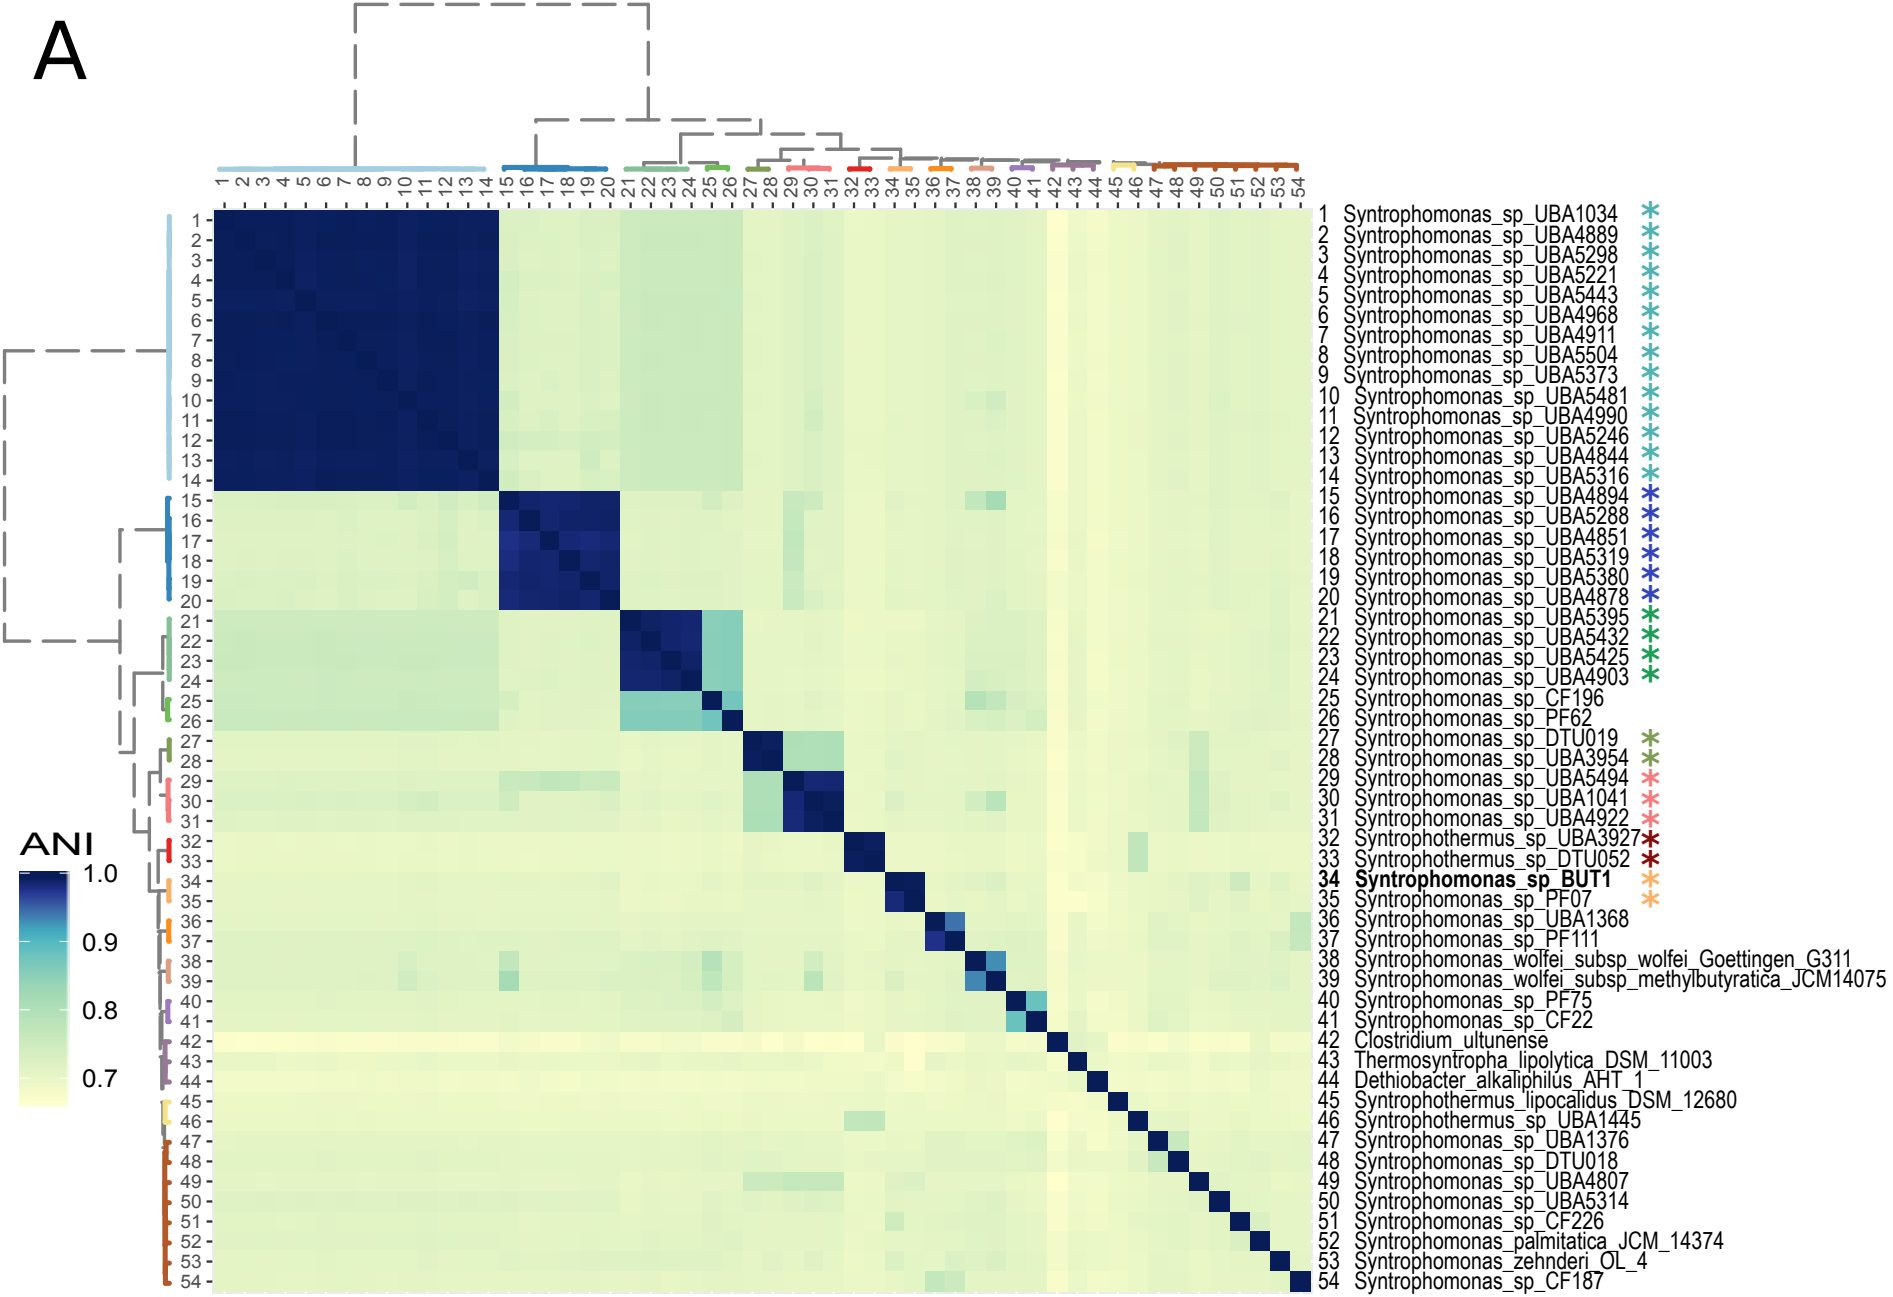**B**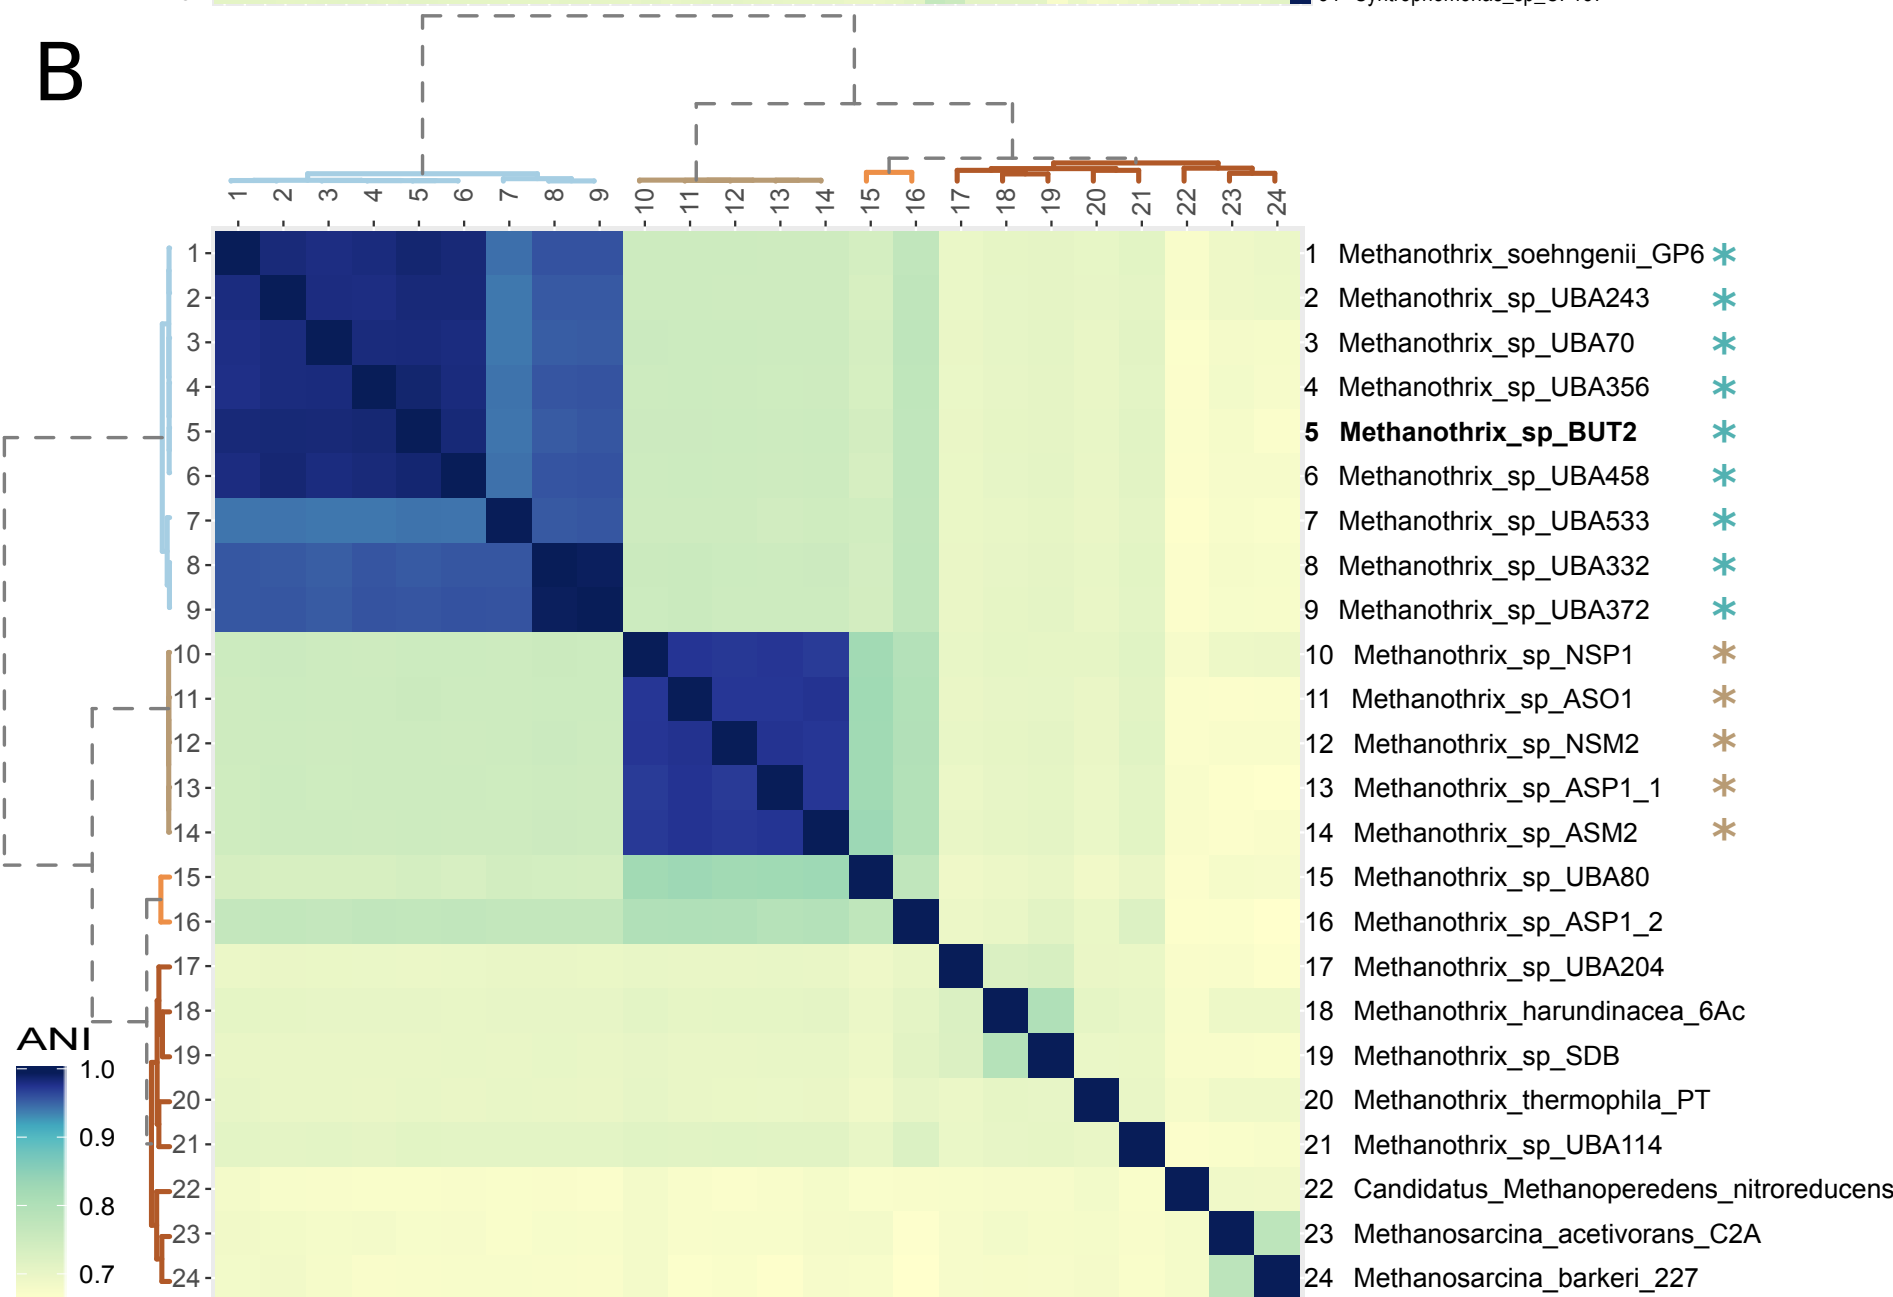

Supplement: mSystems.00159-19-sf004.pdf [file mSystems.00159-19-sf004.pdf]
